# Supplementary material for: High performance alternating polymers based on two-dimensional conjugated benzo[1,2-b:4,5-b′]dithiophene and fluorinated dithienylbenzothiadiazole for solar cells
Source: Royal Society of Chemistry journal article supplement (doi:10.1039/c6ra13595a), 2016-01-01
Supplement: c6ra13595a1.pdf [file c6ra13595a1.pdf]

Supporting Information

## High Performance Alternating Polymers Based on Two-dimensional Conjugated Benzo[1,2-b:4,5-b']dithiophene and Fluorinated Dithienylbenzothiadiazole for Solar Cells<sup>‡</sup>

Zhiyuan Cong,<sup>a,b,†</sup> Shuo Liu<sup>c,†</sup> Baofeng Zhao,<sup>a, b</sup> Weiping Wang<sup>a,b</sup> Hongli Liu<sup>a,b</sup>  
Jin Su,<sup>a</sup> Zhaoqi Guo,<sup>a, b</sup> Wei Wei,<sup>c</sup> Chao Gao,<sup>a, b,\*</sup> Zhongwei An<sup>a, b,\*</sup>

<sup>a</sup> State Key Laboratory of Fluorine & Nitrogen Chemicals, Xi'an, Shaanxi, 710065, P.R.China.

<sup>b</sup> Xi'an Modern Chemistry Research Institute, Xi'an, Shaanxi, 710065, P. R. China. E-

Mail: chaogao1974@hotmail.com (C. Gao), gmecazw@163.com (Z. An).

<sup>c</sup> Institute of Advanced Materials, Nanjing University of Posts and Telecommunications, Nanjing 210003, P.

R. China.

<sup>‡</sup> These authors contributed equally to this work.

### Content

| Content                                                                                                                                                    | Page |
|------------------------------------------------------------------------------------------------------------------------------------------------------------|------|
| <b>Figure S1.</b> J-V and EQE curves of the PSCs based on various D/A ratios.                                                                              | 2    |
| <b>Table S1.</b> Photovoltaic results of the PSCs based on <b>P1</b> , <b>P2</b> and <b>P3</b> blended with PC <sub>71</sub> BM at different weight ratios | 2    |
| <b>Figure S2.</b> Absorption spectra of <b>P3</b> with different molecular weight                                                                          | 4    |
| <b>Figure S3.</b> Cyclic voltammograms of three P3 films with different molecular weight                                                                   | 4    |
| <b>Table S2.</b> Optical, electrochemical properties of three P3 films with different molecular weight                                                     | 4    |
| <b>Figure S4.</b> J-V and EQE curves of PSCs based on medium MW <b>P3</b> blended with PC <sub>71</sub> BM at different weight ratios.                     | 5    |
| <b>Table S3.</b> Photovoltaic results of the PSCs based on medium MW <b>P3</b> blended with PC <sub>71</sub> BM at different weight ratios.                | 5    |

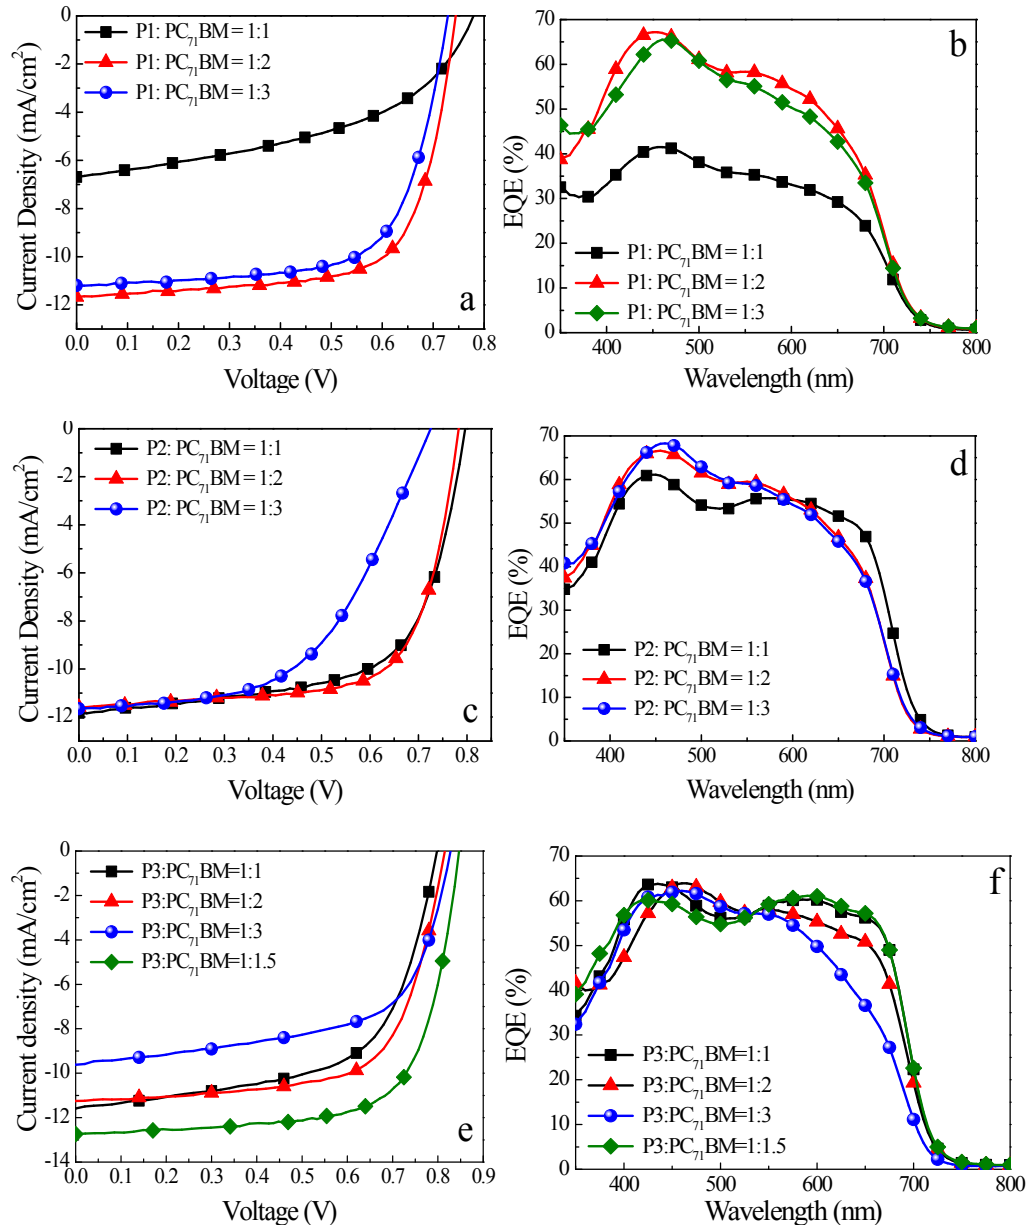

**Figure S1**  $J$ - $V$  (a, c, e) and EQE (b, d, f) curves of the PSCs based on **P1**, **P2** and **P3** blended with  $PC_{71}BM$  at different weight ratios.

**Table S1** Photovoltaic results of the PSCs based on **P1**, **P2** and **P3** blended with  $PC_{71}BM$  at different weight ratios under the illumination of AM1.5G (100mW/cm<sup>2</sup>)

| Active layer            | D:A | $V_{oc}$<br>(V) | $J_{sc}$<br>(mA/cm <sup>2</sup> ) | FF<br>(%) | PCE<br>(%) |
|-------------------------|-----|-----------------|-----------------------------------|-----------|------------|
| <b>P1</b> : $PC_{71}BM$ | 1:1 | 0.78            | 6.69                              | 46.4      | 2.42       |
|                         | 1:2 | 0.75            | 11.7                              | 69.2      | 6.07       |
|                         | 1:3 | 0.74            | 11.2                              | 67.5      | 5.59       |

|                             |       |      |       |      |      |
|-----------------------------|-------|------|-------|------|------|
| <b>P2:PC<sub>71</sub>BM</b> | 1:1   | 0.80 | 11.8  | 63.9 | 6.03 |
|                             | 1:2   | 0.79 | 11.6  | 69.1 | 6.33 |
|                             | 1:3   | 0.73 | 11.7  | 52.9 | 4.52 |
| <b>P3:PC<sub>71</sub>BM</b> | 1:1   | 0.80 | 11.58 | 60.8 | 6.05 |
|                             | 1:1.5 | 0.85 | 12.70 | 69.3 | 7.48 |
|                             | 1:2   | 0.82 | 11.2  | 66.7 | 6.61 |
|                             | 1:3   | 0.82 | 9.62  | 61.8 | 5.24 |

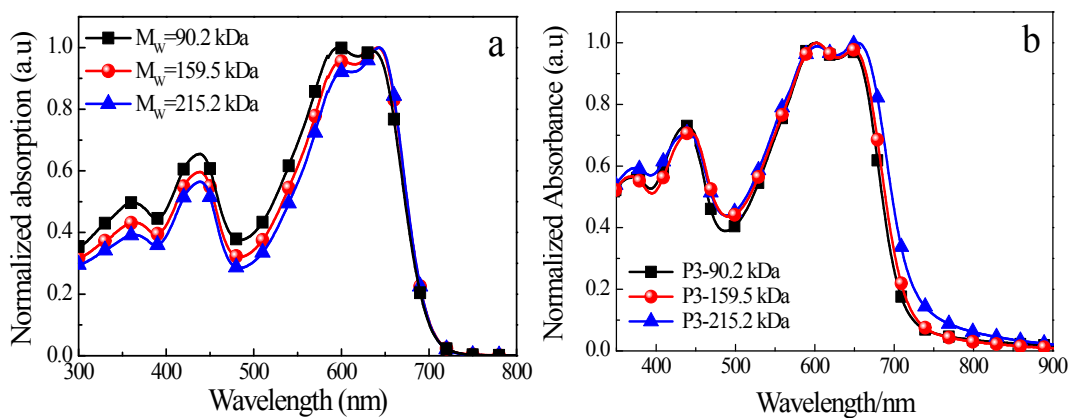

**Figure S2** Absorption spectra of **P3** with different molecular weight in chloroform (a), and the absorption spectra of the corresponding films (b).

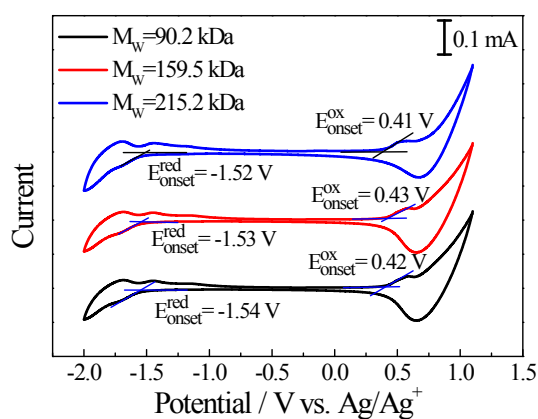

**Figure S3** Cyclic voltammograms of three **P3** films with different molecular weight on a glassy carbon electrode measured in 0.1 mol/L  $Bu_4NPF_6$  solutions at a scan rate of 50 mV/s.

**Table S2** Optical, electrochemical properties of three **P3** films with different molecular weight

| Polymer   | Mn<br>[kDa] | Mw<br>[kDa] | PDI  | $\lambda_{edge}$<br>[nm] | $E_g^{opt\ a)}$<br>[eV] | $E_{red}^{b)}$<br>[V] | $E_{ox}^{c)}$<br>[V] | HOMO <sup>b)</sup><br>[eV] | LUMO <sup>b)</sup><br>[eV] | $E_g^{b)}$<br>[eV] |
|-----------|-------------|-------------|------|--------------------------|-------------------------|-----------------------|----------------------|----------------------------|----------------------------|--------------------|
| <b>P3</b> | 24.2        | 90.2        | 3.73 | 710                      | 1.75                    | -1.54                 | 0.42                 | -5.13                      | -3.17                      | 1.96               |
| <b>P3</b> | 40.8        | 159.5       | 3.91 | 714                      | 1.74                    | -1.53                 | 0.43                 | -5.14                      | -3.18                      | 1.96               |
| <b>P3</b> | 46.3        | 215.2       | 4.65 | 722                      | 1.72                    | -1.52                 | 0.41                 | -5.12                      | -3.19                      | 1.93               |

a) estimated from the onset of electronic absorption of the polymer films ( $E_g^{opt} = 1240/\lambda(\text{nm})$ ).

b) cyclic voltammetry results.

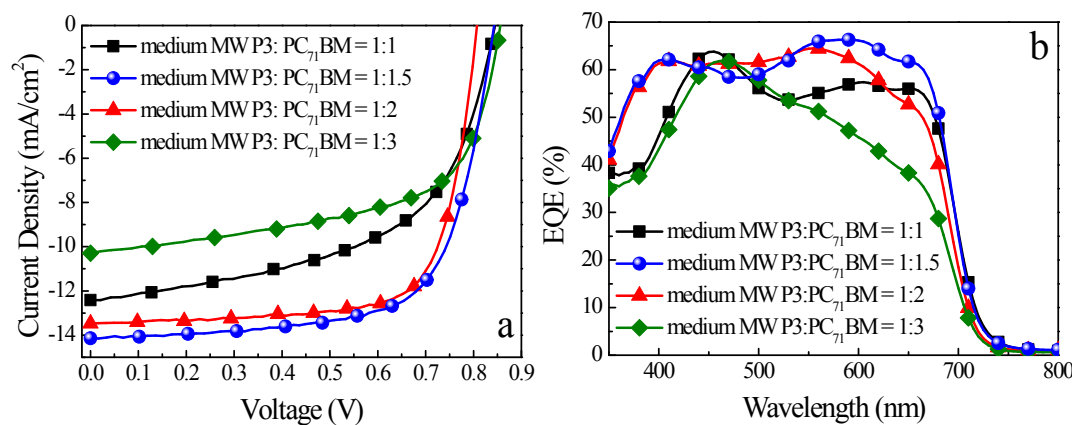

**Figure S4**  $J$ - $V$  (a) and EQE (b) curves of the PSCs based on medium MW **P3** blended with PC<sub>71</sub>BM at different weight ratios.

**Table S3** Photovoltaic results of the PSCs based on medium MW **P3** blended with PC<sub>71</sub>BM at different weight ratios under the illumination of AM1.5G ( $100 \text{ mW}/\text{cm}^2$ )

| Active layer                   | D:A   | $V_{oc}$ (V) | $J_{sc}$ ( $\text{mA}/\text{cm}^2$ ) | FF (%) | PCE (%) |
|--------------------------------|-------|--------------|--------------------------------------|--------|---------|
| <b>P3</b> :PC <sub>71</sub> BM | 1:1   | 0.84         | 12.4                                 | 55.5   | 5.81    |
|                                | 1:1.5 | 0.85         | 14.1                                 | 68.1   | 8.16    |
|                                | 1:2   | 0.82         | 13.5                                 | 72.5   | 8.02    |
|                                | 1:3   | 0.86         | 10.3                                 | 59.6   | 5.26    |
